# Supplementary material for: An adjuvanted zoster vaccine elicits potent cellular immune responses in mice without QS21
Source: PubMed Central journal article supplement (PMC9033770; doi:10.1038/s41541-022-00467-z), 2022-04-22
Supplement: 41541_2022_467_MOESM1_ESM.pdf [file 41541_2022_467_MOESM1_ESM.pdf]

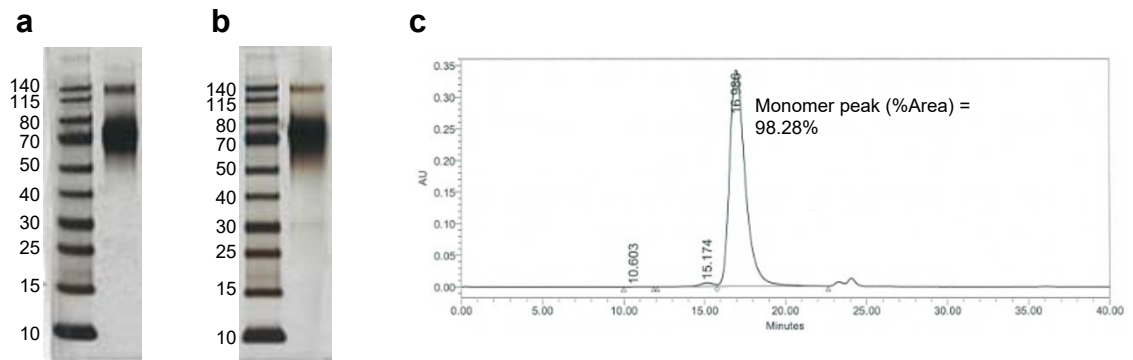

Supplementary Figure 1. SDS-PAGE and chromatography results for purified gE protein. (a, b) The purity of recombinant VZV gE protein was verified using SDS-PAGE followed by silver staining. SDS-PAGE was performed under (a) non-reducing and (b) reducing conditions. (c) The purity of the recombinant VZV gE protein was verified by size exclusion chromatography using a BioSep-SEC-s3000 column.
